# Supplementary material
Source: Springer Nature journal article supplement (https://www.springermedizin.de/resource/supplementary/12936_2013_2890_MOESM2_ESM.pdf/9544530)

◆ Antibodies      ● pLDH      □ Microscopy

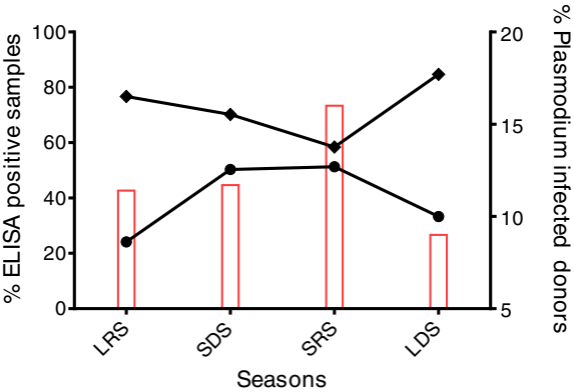

Supplement: MOESM2 [file 9544530]
